# Supplementary material
Source: ML conference proceedings conference paper supplement (https://openaccess.thecvf.com/content/WACV2022/html/Abuolaim_Improving_Single-Image_Defocus_WACV_2022_paper.html)
Supplement: Supplementary file 2 [file Abuolaim_Improving_Single-Image_Defocus_WACV_2022_supplemental.zip]

Archive with 10 entries (9 files):
- 0462-supp.pdf
- videos/
- videos/main_fig_1.mp4
- videos/main_fig_4.mp4
- videos/main_fig_6.mp4
- videos/supp_fig_s3_dataset_example.mp4
- videos/supp_fig_s4_dataset_example.mp4
- videos/supp_fig_s5_dataset_example.mp4
- videos/supp_fig_s6_dataset_example.mp4
- videos/supp_fig_s7_image_motion.mp4
